# Supplementary material for: Comprehensive analysis of locomotion dynamics in the protochordate Ciona intestinalis reveals how neuromodulators flexibly shape its behavioral repertoire
Source: PLoS Biol. 2022 Aug 4;20(8):e3001744. doi: 10.1371/journal.pbio.3001744 (PMC9352054; doi:10.1371/journal.pbio.3001744)
Supplement: S1 Table — (XLSX) [file pbio.3001744.s021.xlsx]

## Sheet: S1 Table
Drug	Stimulus	#Number of animals
Wild-type	-	694
Clomipramine	-	59
Chlorpromazine	-	51
Methiothepin	-	77
Imipramine	-	69
Mianserin	-	39
Phentolamine	-	38
Fluoxetine	-	32
Paroxetine	-	57
⍺-Methylserotonin	-	55
Serotonin	-	64
Ascorbic acid	-	64
Dopamine	-	88
Raclopride	-	35
Quinpirole	-	41
None (Control)	Blue light	23
None (Control)	Green light	37
None (Control)	Red light	27
None (Control)	White light	18
