# Supplementary material for: Comprehensive analysis of locomotion dynamics in the protochordate Ciona intestinalis reveals how neuromodulators flexibly shape its behavioral repertoire
Source: PLoS Biol. 2022 Aug 4;20(8):e3001744. doi: 10.1371/journal.pbio.3001744 (PMC9352054; doi:10.1371/journal.pbio.3001744)
Supplement: S3 Table — (XLSX) [file pbio.3001744.s023.xlsx]

## Sheet: S3 Table
Greater than
	cN	cTB	cTprM	cTM	cTpoM	cTT
cN		1	1	1	1.9E-151	0
cTB	0		1.65E-57	0	0	0
cTprM	0	1		0	0	0
cTM	0	1	1		0	0
cTpoM	1	1	1	1		0
cTT	1	1	1	1	1
Less than
	cN	cTB	cTprM	cTM	cTpoM	cTT
cN		0	0	0	1	1
cTB	1		1	1	1	1
cTprM	1	1.65E-57		1	1	1
cTM	1	0	0		1	1
cTpoM	1.9E-151	0	0	0		1
Two-sided
	cN	cTB	cTprM	cTM	cTpoM	cTT
cN		0	0	0	3.8E-151	0
cTB	0		3.3E-57	0	0	0
cTprM	0	3.3E-57		0	0	0
cTM	0	0	0		0	0
cTpoM	3.8E-151	0	0	0		0
