# Supplementary material for: Comprehensive analysis of locomotion dynamics in the protochordate Ciona intestinalis reveals how neuromodulators flexibly shape its behavioral repertoire
Source: PLoS Biol. 2022 Aug 4;20(8):e3001744. doi: 10.1371/journal.pbio.3001744 (PMC9352054; doi:10.1371/journal.pbio.3001744)
Supplement: S14 Table — (XLSX) [file pbio.3001744.s034.xlsx]

## Sheet: S14 Table
drug	cN	cTB	cTprM	cTM	cTpoM	cTT	rtN	rtTB	rtTprM	rtTM	rtTpoM	rtTT	EC1	EC2	EC3	EC4	EC5	EC6	Quirkiness	sN	sTB	sTprM	sTM	sTpoM	sTT
Raclopride	1	1	1	1	1	1	0	1	1	1	1	1	1	0	0	2.86253e-279	8.04614e-130	0	1	0	0	0	0	0	0
Paroxetine	1.22983e-40	0	0	0	0	1	1	1	0	0	0	0	0	0	4.12023e-157	0	1	0	1	0.406645	1	1	1	1	1
Fluoxetine	1	1	1	1	1	1	1	1	1	1	1	1	1	1	0	0	1	1	0	1	1	1	1	1	1
Methiothepin	0	0	0	0	0	1	0	0	0	0	8.3509e-176	0	0	0	0	1	0	4.47139e-160	1	1	1	1	1	1	1
Clomipramine	0	0	1.18293e-85	0.270701	1	2.12897e-204	0	0	0	0	0	0	0	0	0	1	0	1	0	1.99772e-76	1.02121e-57	1.78121e-06	1	1	1
Serotonin	0	1	1	1	1	1.57113e-158	0	0	0	0	0	0	1	1	0	1	0	1	0	0.0376491	0.000153546	0.000742811	1	1	1
Alpha-methylserotonin	1	1	1	7.24536e-54	1.20975e-60	0	9.57492e-59	1	1	1	1	1	1	1	1	2.41357e-10	0	0	1	1.85431e-12	4.13326e-45	2.97776e-164	2.19218e-261	0	0
Dopamine	1	1	1	1	1	1	1	1	1	1	1	1	1	0	0	1	1	0	1	1	1	1	1	1	1
Imipramine	0	0	0	0	0.00302699	1	0	0	0	0	4.65868e-294	1	0	1	0	1	4.04169e-82	1	1	1	1	1	1	1	1
Chlorpromazine	0	0	1.46052e-24	3.35645e-169	0	4.34642e-47	0	0	0	0	0	0	1.26749e-268	1	5.79898e-72	0	0	1	1	0	0	0	0	0	0
Ascorbic acid	3.14509e-29	1	1	1	0	0	0	0	1.95198e-66	4.52388e-164	1.37043e-67	0	1	1	3.6353e-07	0	0	1	0	1	1	1	1	1	1
Phentolamine	0	0	0	0	2.23686e-55	5.5697e-89	1	0	0	0	1	5.39008e-48	0	1.58932e-140	0	1	1	1	0	0	0	0	0	0	0
Quinpirole	1	1	1	1	1	1	1	1	1	1	1	1	1	0	2.21659e-116	1	1	1.42191e-134	0	1	1	1	1	0.999997	1
Mianserin	1	1	1	1	1	0	0	1	1	1	1	8.27828e-22	1	1	1	1.93865e-231	1	1	1.43965e-206	1	1	1	1	1	1
