# Supplementary material for: Comprehensive analysis of locomotion dynamics in the protochordate Ciona intestinalis reveals how neuromodulators flexibly shape its behavioral repertoire
Source: PLoS Biol. 2022 Aug 4;20(8):e3001744. doi: 10.1371/journal.pbio.3001744 (PMC9352054; doi:10.1371/journal.pbio.3001744)
Supplement: S16 Table — (XLSX) [file pbio.3001744.s036.xlsx]

## Sheet: S16 Table
Motif
	Wild type	Phentolamine	Fluoxetine	Mianserin	Imipramine	Chlorpromazine	Methiothepin	Clomipramine	Paroxetine	Alpha-methylserotonin	Serotonin	Ascorbic acid	Dopamine	Quinpirole	Raclopride
A1	8.64194	8.77627	7.80303	9.67056	10.3769	6.34869	10.4834	10.5358	9.59106	7.57149	8.54743	12.2569	9.75015	10.0296	1.9052
B1	7.57784	8.15822	5.90909	7.81084	8.60052	5.41412	8.13607	8.37197	8.03177	6.80628	6.17589	9.15875	7.55637	8.37918	1.99814
C1	9.31016	11.9901	7.27273	10.2019	9.35875	7.92781	11.5576	11.8238	8.53192	10.8739	8.00395	11.081	11.4767	11.6377	2.36989
D1	7.05562	8.65266	5.30303	6.16366	8.77383	6.60651	7.10165	8.32045	5.7664	6.20217	7.08992	7.82451	7.27199	9.81803	1.9052
E1	5.22503	7.47837	8.18182	6.42933	1.94974	9.28134	2.84464	3.01391	5.94292	5.2356	7.21344	2.89462	4.38757	3.85104	5.4368
F1	10.4781	10.3214	9.16667	12.3273	10.8102	8.12117	13.2684	11.9784	8.62018	11.76	9.46146	11.081	10.908	12.9073	2.88104
G1	5.19134	1.54512	3.0303	4.56961	6.04419	3.28714	4.15755	1.88047	8.03177	4.43012	3.63142	3.32429	3.27036	2.41219	7.66729
H1	5.36542	6.5513	7.12121	5.26036	2.55633	9.66806	3.18281	2.88511	5.08973	5.07451	4.79249	3.05292	4.63132	4.78206	3.76394
I1	6.59236	3.15204	7.5	6.3762	9.55373	4.02836	6.72369	4.8171	10.7385	6.20217	6.9417	4.38716	4.44851	4.31655	5.62268
J1	5.46649	5.19159	4.92424	4.62274	8.77383	4.09281	6.76348	4.97166	5.7664	3.22191	8.44862	5.63094	6.52041	5.79771	3.62454
K1	7.02474	10.3832	4.69697	7.7577	8.9688	5.34966	10.2646	9.19629	7.09032	5.55779	9.11561	9.67888	9.46577	10.2412	1.95167
L1	5.03973	4.20272	11.0606	2.86929	1.90641	6.54206	2.92421	2.70479	2.64784	6.96738	5.65711	2.53279	2.80317	3.30089	5.06506
M1	5.78375	5.00618	0.227273	1.11583	4.83102	11.3761	1.96937	10.3812	1.26508	9.22271	3.85375	7.77929	8.14544	2.58146	49.2565
N1	4.89654	5.62423	8.56061	5.36663	1.99307	6.92878	3.54088	4.37919	4.08944	4.91341	4.34783	2.28403	3.77818	3.63944	3.57807
O1	6.3509	2.96663	9.24242	9.45802	5.5026	5.02739	7.08176	4.73982	8.7967	5.96053	6.71937	7.03302	5.58602	6.30554	2.97398
	Unit=%
