# Supplementary material for: Comprehensive analysis of locomotion dynamics in the protochordate Ciona intestinalis reveals how neuromodulators flexibly shape its behavioral repertoire
Source: PLoS Biol. 2022 Aug 4;20(8):e3001744. doi: 10.1371/journal.pbio.3001744 (PMC9352054; doi:10.1371/journal.pbio.3001744)
Supplement: S19 Table — Dopamine is compared to ascorbic acid in which it was dissolved. (XLSX) [file pbio.3001744.s039.xlsx]

## Sheet: S19 Table
Motif
		Phentolamine	Fluoxetine	Mianserin	Imipramine	Chlorpromazine	Methiothepin	Clomipramine	Paroxetine	Alpha-methylserotonin	Serotonin	Ascorbic acid	Dopamine	Quinpirole	Raclopride
a5		-2.60824	-43.7915	46.3687	19.458	-26.5198	36.1494	28.2177	12.699	-21.9776	11.7862	14.6373	26.6206	44.8737	-87.5156
b5		-46.2666	12.417	24.5691	68.5504	14.0209	31.661	45.5444	31.1406	-57.4424	19.6585	21.9858	5.26291	52.9222	-81.2734
c5		-72.1419	-74.3812	-70.4763	-14.6753	68.1473	-39.7186	-19.9225	-27.1536	0.864281	-19.7716	-0.725922	19.9564	-61.8489	414.106
d5		3.21946	65.1071	-4.28328	-69.5178	-12.6833	-62.3763	-48.3596	-35.1127	-27.3321	-25.2134	-54.8281	84.1754	-40.0305	-18.6065
e5		85.3652	-26.5691	25.613	25.0621	-0.488243	42.9281	14.0272	58.7745	7.91309	-1.39872	66.9228	-15.6849	79.4059	-86.7484
f5		-62.3837	-30.0462	-34.1116	107.731	-24.318	-1.31305	-54.716	-5.64426	-17.6104	7.77103	-28.6646	-41.5597	-53.2552	245.706
g5		-30.8742	2.68858	-26.0371	115.052	-35.8104	56.3474	15.2226	65.4626	23.5354	32.1229	-23.2077	12.2319	-2.2997	28.4854
h5		-15.8168	60.2178	-28.7241	-64.3306	76.7361	22.2951	-26.3532	-26.3039	75.2214	-10.7709	-21.5125	-12.7868	14.0338	22.457
i5		-22.1561	45.776	-17.9709	72.4131	17.4633	41.8713	40.5673	10.1045	-47.6879	69.2029	16.1369	-11.3656	-6.72028	-86.8464
j5		85.2502	50.1683	-4.56397	-79.9408	101.887	16.1525	-43.3621	67.451	-17.8846	12.5819	-51.9579	60.2542	-23.2648	-68.1178
k5		-0.458907	-21.1352	46.7424	-63.9335	-13.3441	-74.9844	-49.9605	-17.4634	22.1877	17.2653	-39.6832	19.5861	-51.0649	-9.86255
l5		0.750094	33.6426	-20.7287	-64.2965	-47.0206	-37.4338	-13.3664	-29.2139	56.9045	-41.3158	-31.859	21.0344	-19.5146	2.14519
m5		73.0788	-46.5202	95.8078	28.1905	-13.8142	48.0456	57.1624	-9.18128	-9.83114	-23.7258	51.4889	3.51234	90.8071	-87.1318
n5		8.58803	47.7917	-88.492	-72.7884	-39.1396	-70.9742	-37.5733	-64.0333	35.4211	11.998	-45.6899	-21.6535	-57.8658	-22.1495
o5		8.72687	-66.065	22.2107	50.9104	-0.566937	58.5247	86.9853	38.7091	-35.0526	-41.3035	111.957	-31.5215	34.2346	-78.5659
	Unit=%
