# Supplementary material for: Comprehensive analysis of locomotion dynamics in the protochordate Ciona intestinalis reveals how neuromodulators flexibly shape its behavioral repertoire
Source: PLoS Biol. 2022 Aug 4;20(8):e3001744. doi: 10.1371/journal.pbio.3001744 (PMC9352054; doi:10.1371/journal.pbio.3001744)
Supplement: S31 Table — (XLSX) [file pbio.3001744.s051.xlsx]

## Sheet: S31 Table
stimuli_name	stim_stat	cN	cTB	cTprM	cTM	cTpoM	cTT	rtN	rtTB	rtTprM	rtTM	rtTpoM	rtTT	EC1	EC2	EC3	EC4	EC5	EC6	Quirkiness	sN	sTB	sTprM	sTM	sTpoM	sTT
blue	tOFFafter	0.00318397	0.00387764	0.0006667	0.00498708	0.00528245	-0.00155281	0.0207922	-0.000198232	-0.010237	0.0193871	-0.150127	-0.382983	0.0147562	-0.016271	0.0129276	0.00795645	0.00966125	0.00416398	0.97025	2.11411	2.53883	3.28695	3.46569	3.38299	4.10265
	tOFFbefore	0.000690789	0.00132069	0.000540449	0.00300274	0.00361016	-0.00458995	0.0370818	0.0421527	0.00757739	0.03485	0.0361901	-0.165745	0.00473934	-0.0137973	0.0189317	0.011742	0.00864726	0.00378954	0.979764	1.66829	1.88415	2.34098	2.37274	2.2469	2.66826
green	tOFFafter	0.00198372	0.00172385	-0.00190753	-0.000981856	8.55395e-05	-0.00381873	-0.265393	-0.267061	-0.271442	-0.28506	-0.313191	-0.331275	-0.00115316	-0.00936495	0.0197918	-0.00307098	0.00399175	0.00337282	0.961568	3.79137	4.46155	5.59865	5.38335	4.6789	5.85705
	tOFFbefore	0.000968511	2.24156e-05	-0.00107604	0.00176029	0.00169689	-0.00396723	-0.251149	-0.290847	-0.27496	-0.25383	-0.236222	-0.246535	0.000181325	-0.0113644	0.017406	0.00714469	0.00516961	0.00420262	0.97089	3.00866	3.45579	4.1956	4.14062	3.66809	4.23885
red	tOFFafter	0.0027131	-5.06516e-05	0.000958706	0.00320029	0.00074122	-0.00729082	0.0212335	0.302026	0.352024	0.344651	0.327169	0.32308	0.00273616	-0.00293359	0.0218973	0.011884	0.0105208	-0.00079429	0.964582	2.81346	3.6713	4.55966	4.51779	4.10804	5.30942
	tOFFbefore	0.00323892	0.000276166	0.00241523	0.00394238	3.18049e-05	-0.00721979	0.0438659	0.064429	0.0513929	0.0758464	0.0811812	0.0192844	0.00428284	-0.00919997	0.0280912	0.0137342	0.00979394	-0.00485206	0.976749	1.91461	2.33214	2.92491	3.02582	2.66682	3.02944
white	tOFFafter	0.00319523	0.00391723	0.00276587	0.00423065	0.00522596	0.00385953	0.000431116	0.0394117	0.235221	0.246834	0.272717	0.316043	0.0200267	-0.0169833	0.00119503	0.000709899	0.00797396	-0.0015568	0.962462	4.4655	5.75583	7.37634	7.55646	7.09532	9.07601
	tOFFbefore	0.00367486	0.00498327	0.00377632	0.00576263	0.00859113	0.00334389	-0.0680973	0.00334149	0.00348087	-0.000248089	0.0666936	0.138434	0.0276651	-0.0177618	-0.00197316	0.00406509	0.00994075	0.00400925	0.971093	3.56472	4.31538	5.53955	5.80179	5.58103	6.78661
