# Supplementary material for: Comprehensive analysis of locomotion dynamics in the protochordate Ciona intestinalis reveals how neuromodulators flexibly shape its behavioral repertoire
Source: PLoS Biol. 2022 Aug 4;20(8):e3001744. doi: 10.1371/journal.pbio.3001744 (PMC9352054; doi:10.1371/journal.pbio.3001744)
Supplement: S44 Table — (XLSX) [file pbio.3001744.s064.xlsx]

## Sheet: S44 Table
	p-value
5 sec motif clusters	a5	b5	c5	d5	e5	f5	g5	h5	i5	j5	k5	l5	m5	n5	o5
Drug
Alpha-methylserotonin	0.42885	0.094123	0.910201	0.398891	0.0132476	0.173482	0.109676	0.140357	0.453105	0.39675	0.263292	0.280626	0.561767	0.185343	0.31268
Chlorpromazine	0.584762	0.925413	0.377132	0.231151	0.934321	0.240567	0.853929	0.706058	0.984468	0.23311	0.572336	0.764598	0.710494	0.723034	0.759271
Clomipramine	0.779516	0.607645	0.609872	0.324705	0.444849	0.00459499	0.589766	0.827897	0.828095	0.323983	0.190971	0.73043	0.539906	0.939675	0.666773
Dopamine	0.250453	0.761578	0.420567	0.116376	0.67958	0.332674	0.351578	0.758741	0.375438	0.733205	0.311484	0.435638	0.250436	0.983281	0.0293033
Fluoxetine	0.343959	0.614161	0.247038	0.350675	0.569735	0.168285	0.89213	0.0215253	0.32024	0.403394	0.60383	0.433779	0.759034	0.199902	0.92108
Imipramine	0.724153	0.882644	0.107975	0.433749	0.0429606	0.901644	0.802338	0.666298	0.647732	0.255507	0.572643	0.458152	0.72496	0.365638	0.111989
Methiothepin	0.706866	0.448848	0.257432	0.0644538	0.434566	0.0862506	0.19821	0.928965	0.804733	0.384366	0.135513	0.922399	0.223799	0.526495	0.983773
Mianserin	0.515223	0.254613	0.96834	0.249165	0.745866	0.203998	0.3292	0.062548	0.472833	0.00526476	0.0276571	0.936255	0.145283	0.551402	0.971975
Paroxetine	0.370969	0.909052	0.321881	0.418131	0.0286442	0.713308	0.117883	0.240036	0.296584	0.033497	0.550708	0.596613	0.212093	0.930362	0.483349
Phentolamine	0.456305	0.113839	0.601845	0.504127	0.0615601	0.824855	0.0687127	0.49205	0.0759246	0.333439	0.980119	0.918529	0.116926	0.877234	0.938334
Quinpirole	0.278565	0.651396	0.691687	0.591881	0.289054	0.465144	0.993358	0.5519	0.33763	0.275353	0.938135	0.117094	0.0303031	0.748062	0.637024
Raclopride	0.385066	0.836204	0.341263	0.100063	0.901442	0.0282469	0.265129	0.914585	0.241597	0.177083	0.155358	0.272348	0.276808	0.826084	0.680062
Serotonin	0.635739	0.446817	0.133583	0.338056	0.573208	0.318689	0.918288	0.00255145	0.0311439	0.777041	0.91932	0.0140134	0.982099	0.615699	0.000516399
